# Supplementary material for: On the dependent recognition of some long zinc finger proteins
Source: Nucleic Acids Res. 2023 Mar 23;51(11):5364–76. doi: 10.1093/nar/gkad207 (PMC10287918; doi:10.1093/nar/gkad207)
Supplement: gkad207_Supplemental_File [file gkad207_supplemental_file.pdf]

# Supplemental Information and Experimental methods descriptions

## Protein constructs and expression

For ZFY-related proteins, 6x-His-SUMO tag was fused to the N-terminus of ZFP coding sequences and cloned into NEB DHFR construct, whereas for CTCF and its mutant, 6x-His-HALO tag was fused to the N-terminus of CTCF coding sequences with TEV protease cleavage site as linker sequence as Fig. S1 and S2.

| Protein (Uniprot ID) | Construct                  | Included coding region |
|----------------------|----------------------------|------------------------|
| Human ZFY (P08048)   | hisSUMO-ZFY-full           | 390-782                |
|                      | hisSUMO-ZFY(F11-F13)       | 710-768                |
|                      | hisSUMO-ZFY(F9-F13)        | 653-768                |
|                      | hisSUMO-ZFY(F7-F13)        | 596-768                |
|                      | hisSUMO-ZFY(F5-F13)        | 539-768                |
|                      | hisSUMO-ZFY(F1-F11)        | 408-744                |
| Mouse ZFY1 (P10925)  | hisSUMO-mZFY1(F7-F13)      | 578-782                |
| CTCF (Q61164-1)      | hisHALO-CTCF(F1-F9)        | 241-523                |
|                      | hisHALO-CTCF(F1-F11)       | 241-583                |
|                      | hisHALO-CTCF(F1-F11)-R567W | 241-583                |

Table S1, recombinant proteins used in current work

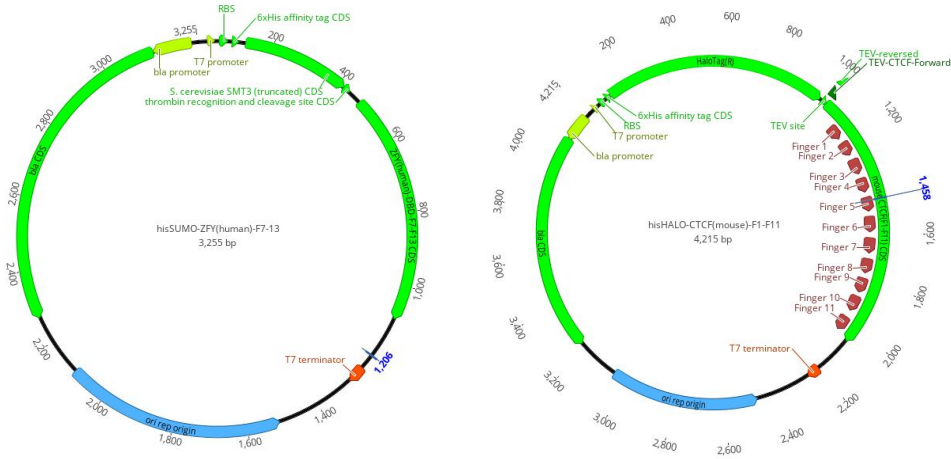

Figure S1 The ZFY and CTCF constructs used in current study.

## Spec-seq libraries sequences, and experimental procedures

For ZFY:

|             |                     |              |              |                    |
|-------------|---------------------|--------------|--------------|--------------------|
| ZFY-Rand1:  | GATAGTCTCATTTTCACCA | NNNN         | TAGGCGTTTCGC | AGATCGGAAGAGCACACG |
| ZFY-Rand2:  | GATAGTCTCATTTTCACCA | GGCC         | NNNNCGTTTCGC | AGATCGGAAGAGCACACG |
| ZFY-Rand3:  | GATAGTCTCATTTTCACCA | GGCCTAGG     | NNNNTCGC     | AGATCGGAAGAGCACACG |
| ZFY-Rand4:  | GATAGTCTCATTTTCACCA | GGCCTAGGCGTT | NNNN         | AGATCGGAAGAGCACACG |
| ZFY-Rand5:  | GATAGTCTCATTTTCACCT | NNNN         | TAGGCGTTTTTG | AGATCGGAAGAGCACACG |
| ZFY-Rand5N: | GATAGTCTCATTTTCACCT | NNNN         | TTATGATTTTTG | AGATCGGAAGAGCACACG |
| ZFY-Rand6:  | GATAGTCTCATTTTCACCT | GGCC         | NNNNCGTTTTTG | AGATCGGAAGAGCACACG |
| ZFY-Rand7:  | GATAGTCTCATTTTCACCT | GGCCTAGG     | NNNNTTTG     | AGATCGGAAGAGCACACG |
| ZFY-Rand8:  | GATAGTCTCATTTTCACCT | GGCCTAGGCGTT | NNNN         | AGATCGGAAGAGCACACG |

ZFY-Rand9: GATAGTCTCATTTTTCACCT **NNNN**TAGTCGTTTTTG AGATCGGAAGAGCACACG  
 ZFY-Rand9N: GATAGTCTCATTTTTCACCT **NNNN**TCACGATTTTTG AGATCGGAAGAGCACACG  
 ZFY-Rand9NN: GATAGTCTCATTTTTCACCT **NNNN**TCACGATTGCC AGATCGGAAGAGCACACG  
 ZFY-Rand10: GATAGTCTCATTTTTCACCT GGCC**NNNN**CGTTTTTG AGATCGGAAGAGCACACG  
 ZFY-Rand11: GATAGTCTCATTTTTCACCT GGCCTAGT**NNNN**TTTG AGATCGGAAGAGCACACG  
 ZFY-Rand12: GATAGTCTCATTTTTCACCT GGCCTAGTCGTT**NNNN** AGATCGGAAGAGCACACG

#### For CTCF:

CTCF-R1: CGTGTGCTCTTCCGATCT **AA** **NNN**AGTGGCCATGGCATC**N**GGTAGGGGGCACTATCGAGAT  
 CTCF-R2: CGTGTGCTCTTCCGATCT **AA** TGC**NNNN**CCCATGGCATC**N**GGTAGGGGGCACTATCGAGAT  
 CTCF-R3: CGTGTGCTCTTCCGATCT **AA** TGCAGTGNNNATGGCATC**N**GGTAGGGGGCACTATCGAGAT  
  
 CTCF-R2L: CGTGTGCTCTTCCGATCT **AT** GC**NNNN**CCCAGTGGCATCCGGTAGGGGGCACTATCGAGAT  
  
 CTCF-R2-m1: CGTGTGCTCTTCCGATCT **AA** TGC**NNNN**CCCATGGCATCTTGTAGGGGGCACTATCGAGAT  
 CTCF-R2-m2: CGTGTGCTCTTCCGATCT **AA** TGC**NNNN**CCCATGGCATGTTGTAGGGGGCACTATCGAGAT  
 CTCF-R2-m3: CGTGTGCTCTTCCGATCT **AA** TGC**NNNN**CCCATGGCATGTTTTAGGGGGCACTATCGAGAT  
  
 CTCF-R2-mC :CGTGTGCTCTTCCGATCT **GT** TGC**NNNN**CCCATGGCATC**M**GGTAGGGGGCACTATCGAGAT  
 CTCF-R2-hmC:CGTGTGCTCTTCCGATCT **TC** TGC**NNNN**CCCATGGCATC**H**GGTAGGGGGCACTATCGAGAT  
 CTCF-R2-fC :CGTGTGCTCTTCCGATCT **CG** TGC**NNNN**CCCATGGCATC**F**GGTAGGGGGCACTATCGAGAT  
 CTCF-R2-caC:CGTGTGCTCTTCCGATCT **GC** TGC**NNNN**CCCATGGCATC**K**GGTAGGGGGCACTATCGAGAT

M,H,F,K are short for methylated, hemimethylated, formyl, and carboxylated cytosines respectively; Randomized region are labeled red; Modification-specific barcodes are labeled green.

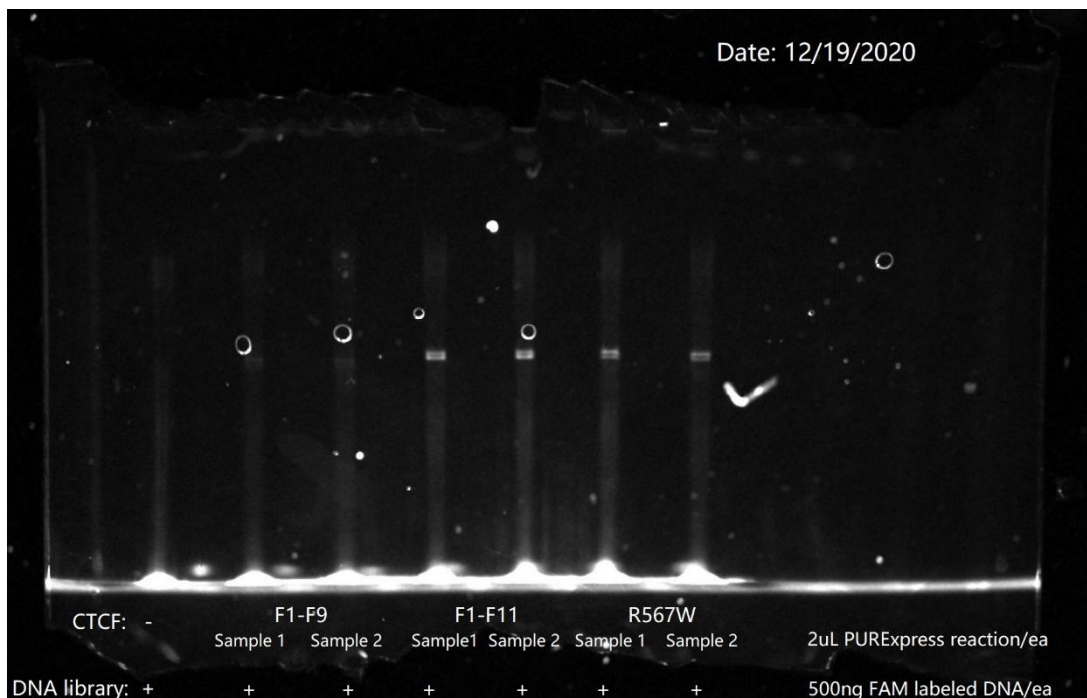

**Figure S2** EMSA separation of bound CTCF-DNA complexes from unbound DNA in various constructs. The binding reaction volume for each sample is 20uL, added with 2uL PURExpress reaction containing CTCF construct. Before sample loading, all reactions are equilibrated at room temp for at least 30mins. 12% Tris-glycine gels were loaded with samples at cold room. Running conditions were set at 200V, 50mins.

## Data analysis procedures and reproducibility check

The data analysis protocol for ZFY and CTCF are very similar to previous work. General introduction to the data analysis protocol can be found at <https://github.com/zeropin/ZFPCookbook>.

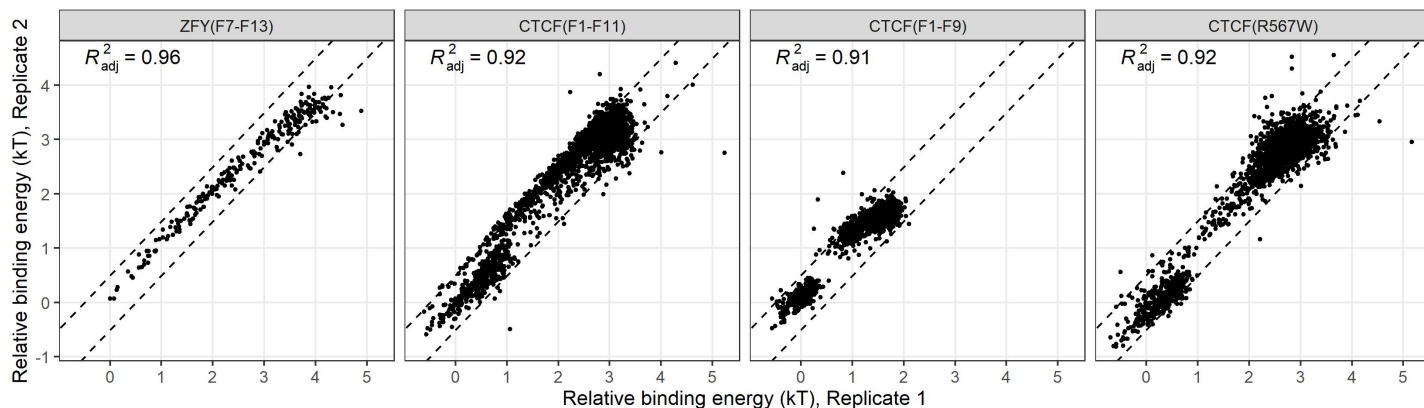

**Figure S3** Data reproducibility for different constructs (Dashed lines are 0.5kT energy deviation bounds).

## Supplemental Informaion for ZFY results

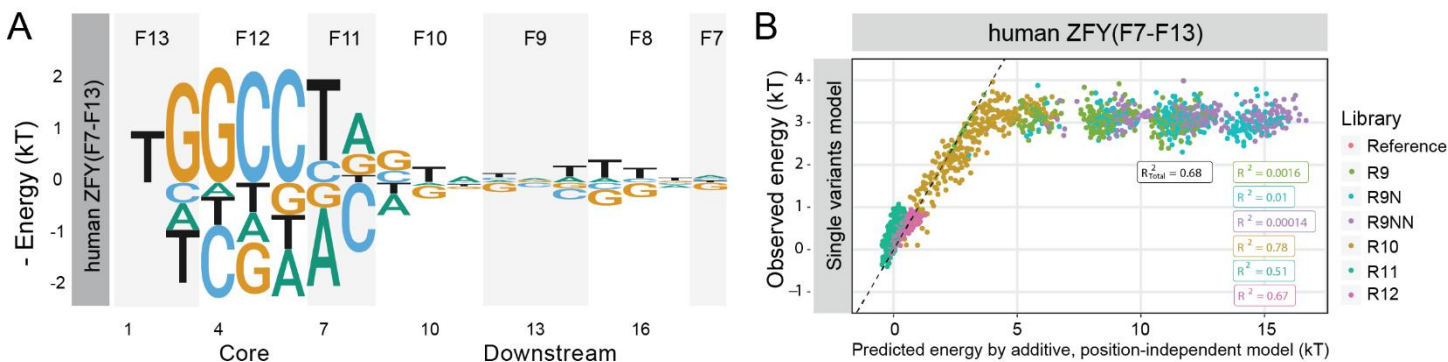

**Figure S4** A) Motif logo of ZFY(F7-F13) generated by regression of energy values of all single variants of reference site; B) Comparison of Observed binding energy values with predicted values by single variants model.

Fluorescence anisotropy

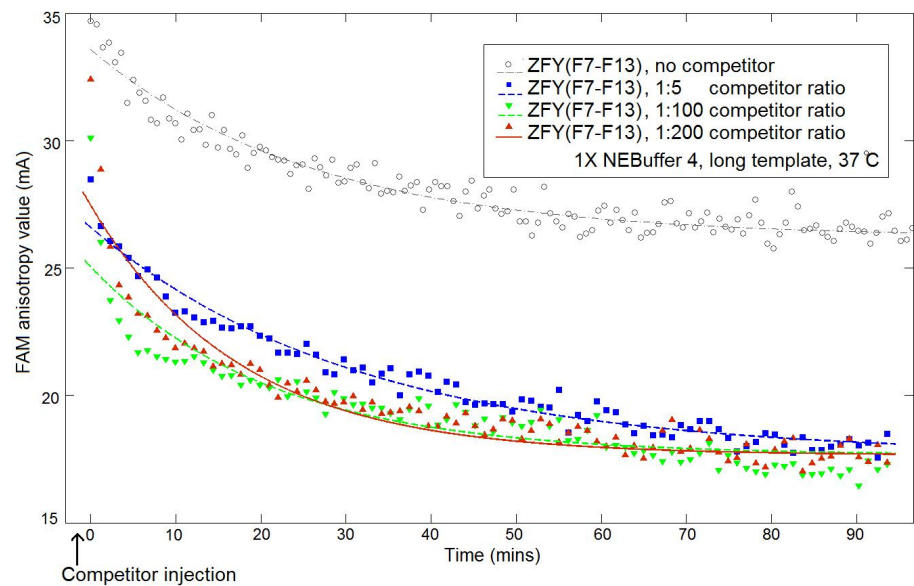

**Figure S5.** Titration effects of unlabeled competitor DNA on FAM-labeled probe DNA. For ZFY(F7-F13), with everything else being the same, different amount of competitor probe were added into binding reaction and the FAM anisotropy values were monitored over time. 200 molar excess of unlabeled competitor probe was found to be more than enough to prevent reassociation of ZFY-DNA complex and thus chosen for dissociation assay.

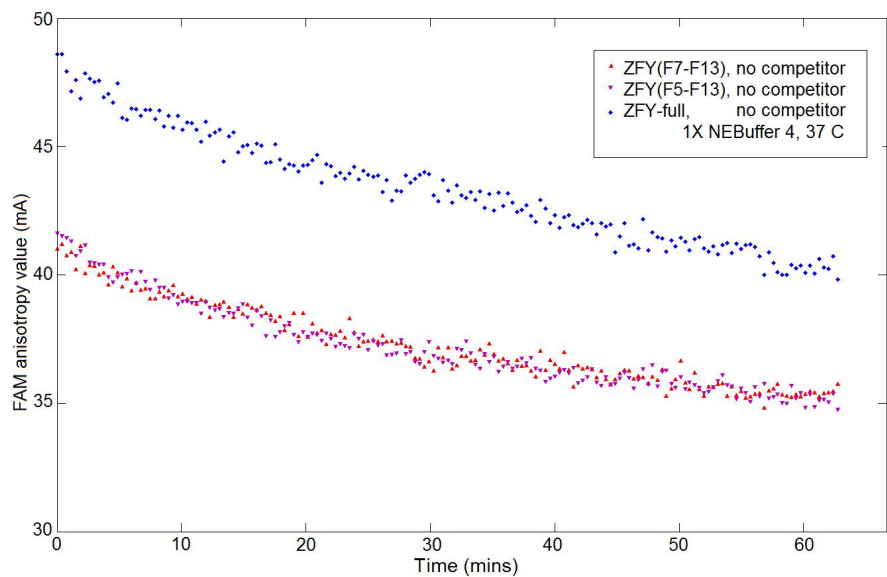

**Figure S6.** Comparison of inactivation rates without competitor DNA. Without competitor probes, we still observed slowly decreasing anisotropy values over time, most likely due to spontaneous inactivation of the zinc finger proteins in room temperature. The observed inactivation rates showed no major difference between different constructs and are significantly slower than the measured dissociation rates.

| DNA | Protein | #1 | #2 | #3 | #4 | #5 | #6 | #7 | Average(s) | Standard |
|-----|---------|----|----|----|----|----|----|----|------------|----------|
|-----|---------|----|----|----|----|----|----|----|------------|----------|

| template                                 | construct   |      |      |      |      |      |      |      |      | deviation (s) |
|------------------------------------------|-------------|------|------|------|------|------|------|------|------|---------------|
| ZFY-reference-long                       | ZFY(F9-F13) | 1049 | 1103 | 1075 | 921  | 1142 |      |      | 1058 | 84            |
| ZFY-reference-long                       | ZFY(F7-F13) | 1245 | 1410 | 1272 | 1447 | 1433 | 1258 | 1443 | 1358 | 95            |
| ZFY-reference-long                       | ZFY(F5-F13) | 1835 | 1756 | 2003 |      |      |      |      | 1865 | 126           |
| ZFY-reference-long                       | ZFY-full    | 2590 | 3127 | 2571 |      |      |      |      | 2763 | 316           |
| ZFY-reference-short                      | ZFY-full    | 1176 | 1007 | 1090 | 993  |      |      |      | 1067 | 85            |
| ZFY-reference-short(weak)                | ZFY-full    | 656  | 726  | 609  |      |      |      |      | 664  | 59            |
| Non-specific site (ZFP57 reference site) | ZFY-full    | 191  | 117  | 106  |      |      |      |      | 138  | 46            |

**Table S2.** Measurement results for dissociation kinetics assay. All measurement results are based on fitting the observed FAM anisotropy vs. time values to single phase exponential curves and the mean lifetimes were reported for each decay curves.

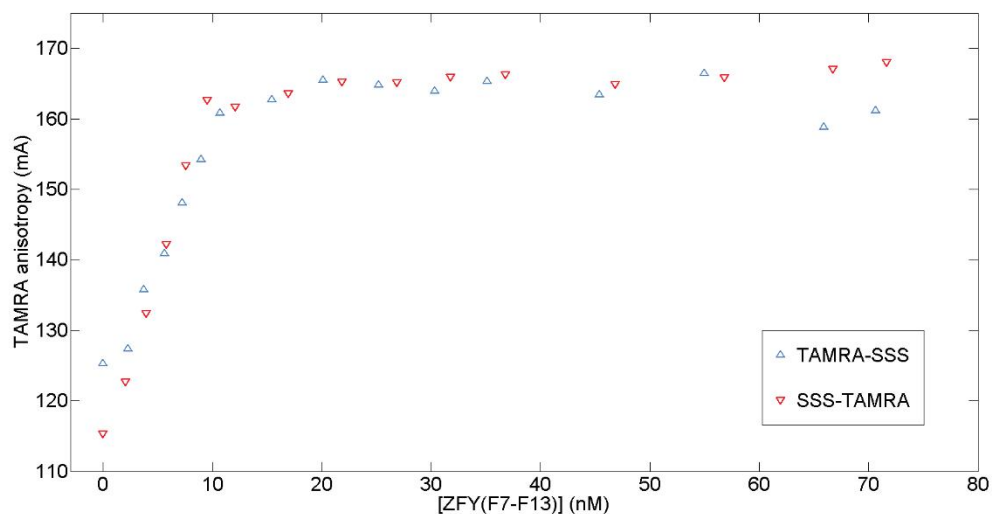

**Figure S7.** TAMRA anisotropy measurement of ZFY(F7-F13) dissociation constants to S-S-S probes. 5nM DNA probes are used in 1X NEBuffer 4, room temperature binding reactions. Since the  $K_d$  are comparable to the probe concentrations, there exist some uncertainty in accurate determination of  $K_d$ , but it was estimated to be around 5nM. Protein concentrations are calibrated to BSA standard by SDA-PAGE gel staining.

## Upstream motifs of CTCF in regular and extended spacing formats

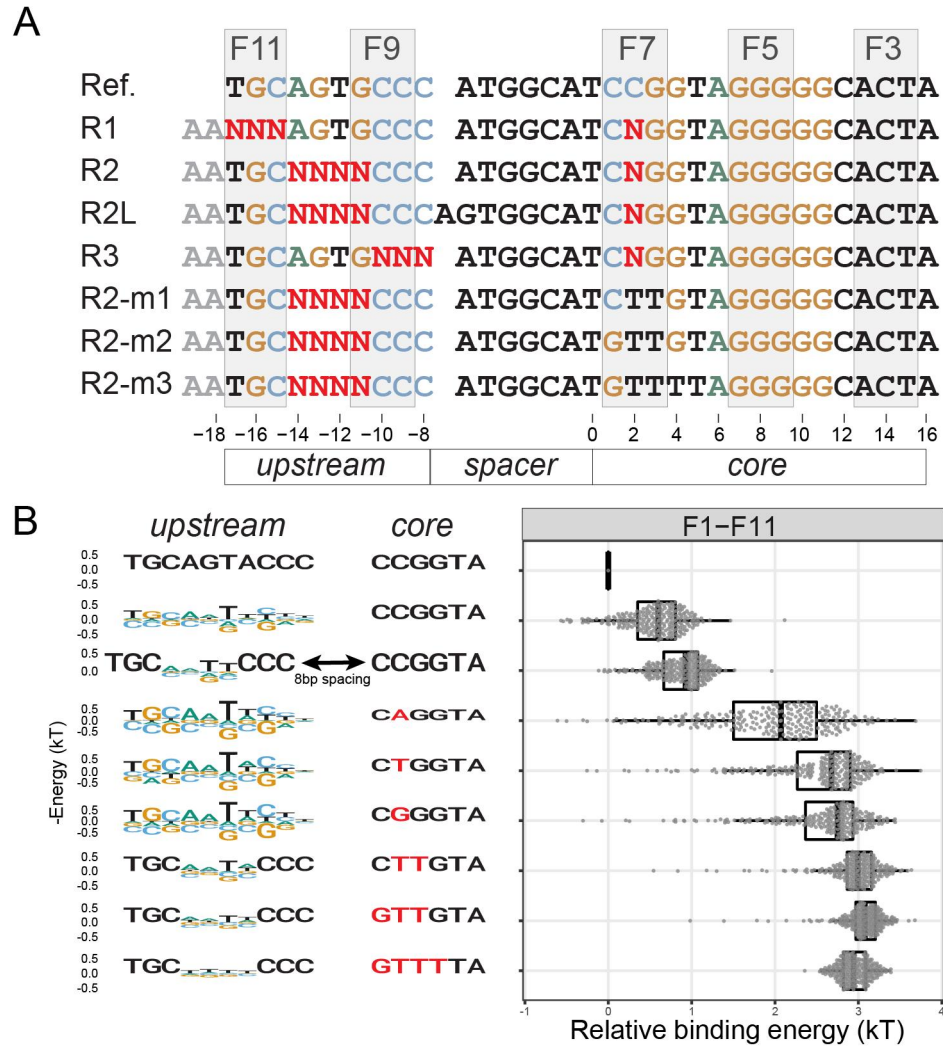

**Figure S8** A) Spec-seq libraries for CTCF, including R2L with extended spacing format; B) Upstream motif profiles associated with different cores, including extended spacing format R2L library.

## Methylation effects on CTCF-DNA interactions

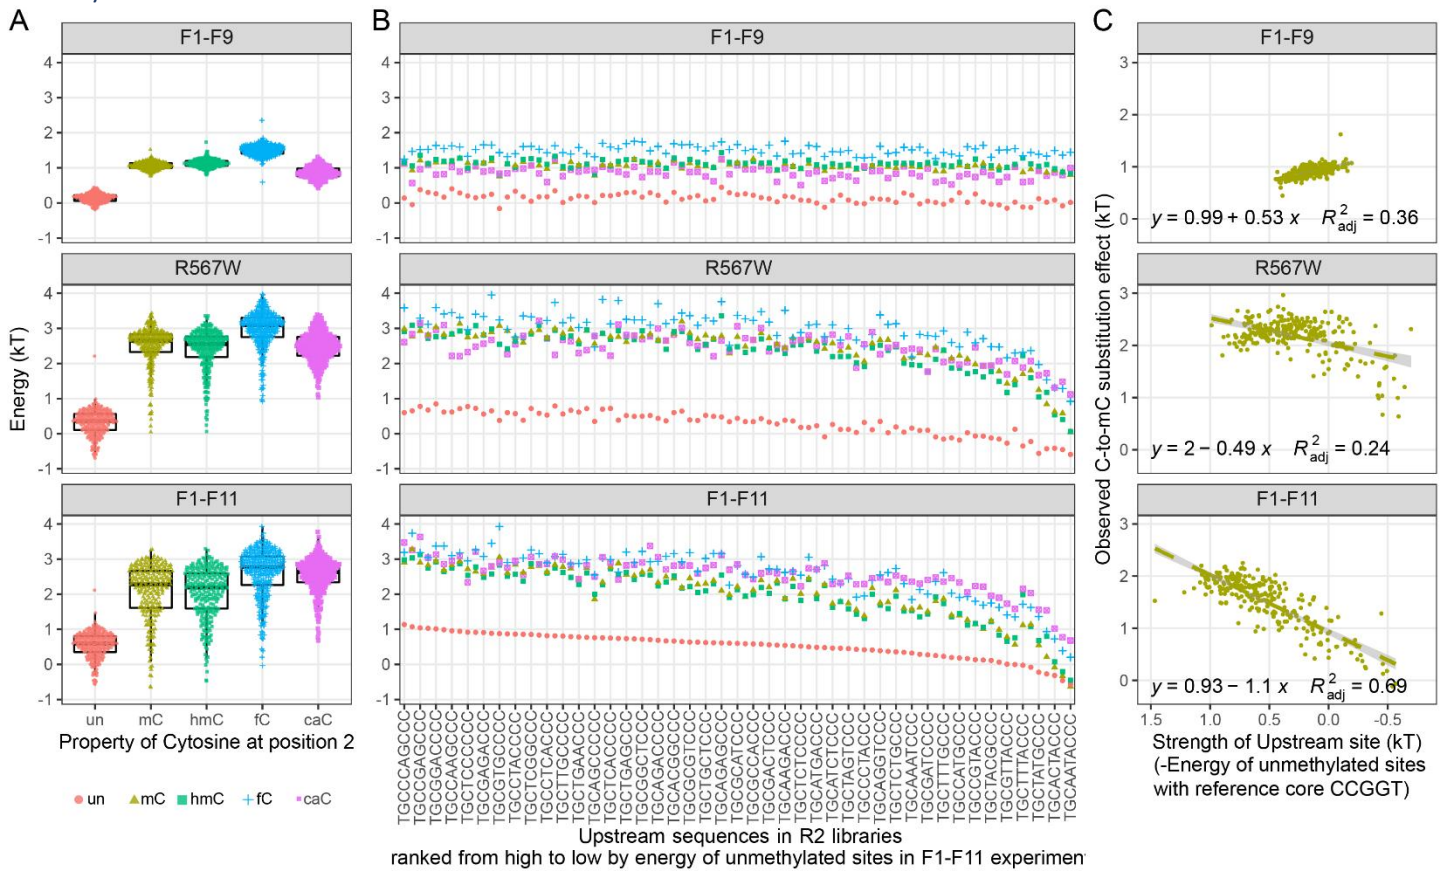

**Figure S9** Methylation effects over different DNA sequences by CTCF constructs.

- A) The energy distribution of different variants by types of modifications and constructs;  
 B) Different types of variants are ranked from low to high affinity by strength of the upstream sites;  
 C) Relationship between observed C-to-mC substitution effect with the strength of upstream sites.

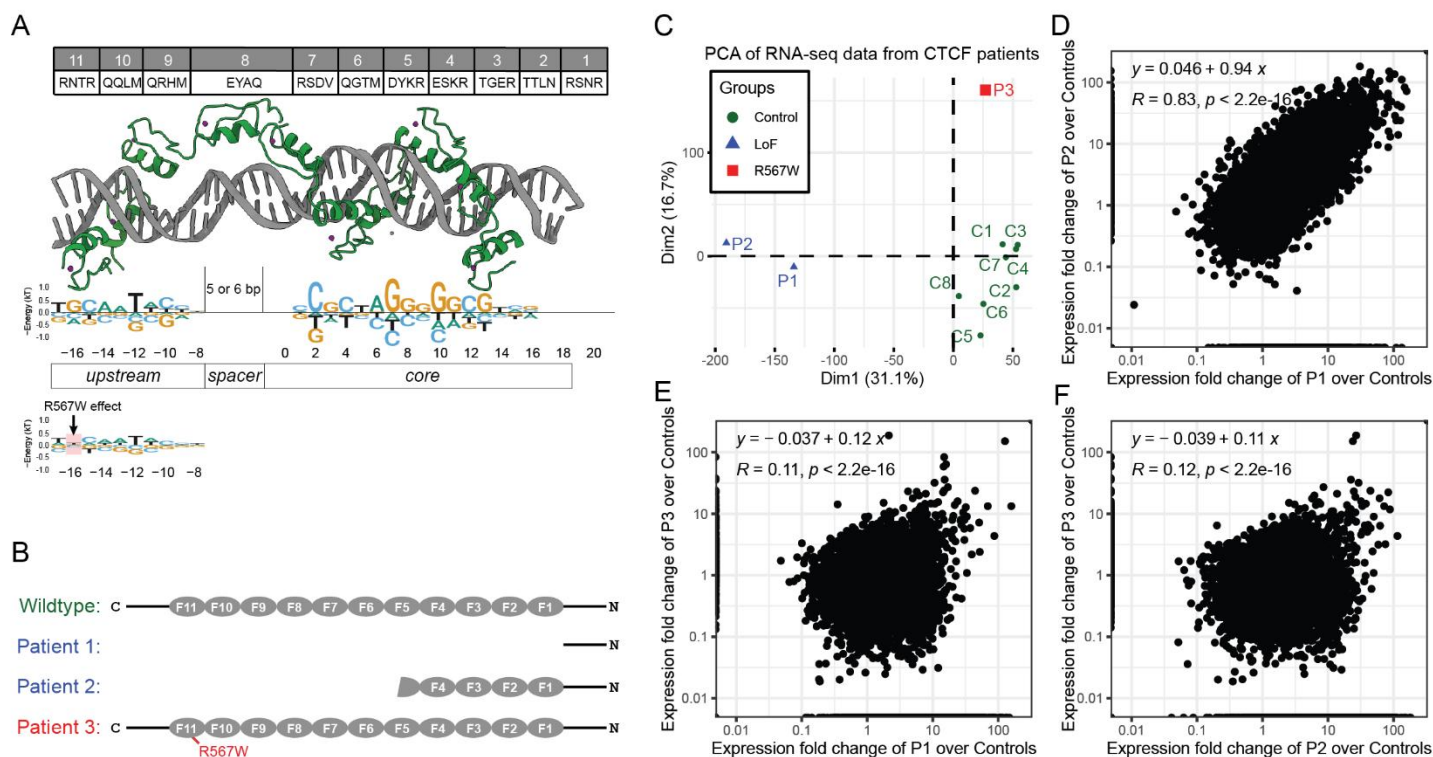

**Figure S10** RNA-seq analysis of blood samples from CTCF R567W patients and LoF patients.

- A) Structural model of CTCF recognition;
- B) CTCF mutation maps from current identified patients;
- C) PCA of RNA-seq data from CTCF patients and healthy controls;
- D) Comparison of expression change between patient 2 to patient 1;
- E) Comparison of expression change between patient 3 to patient 1;
- F) Comparison of expression change between patient 3 to patient 2.

## Supplemental Information for ZIM3 and ZNF343 results

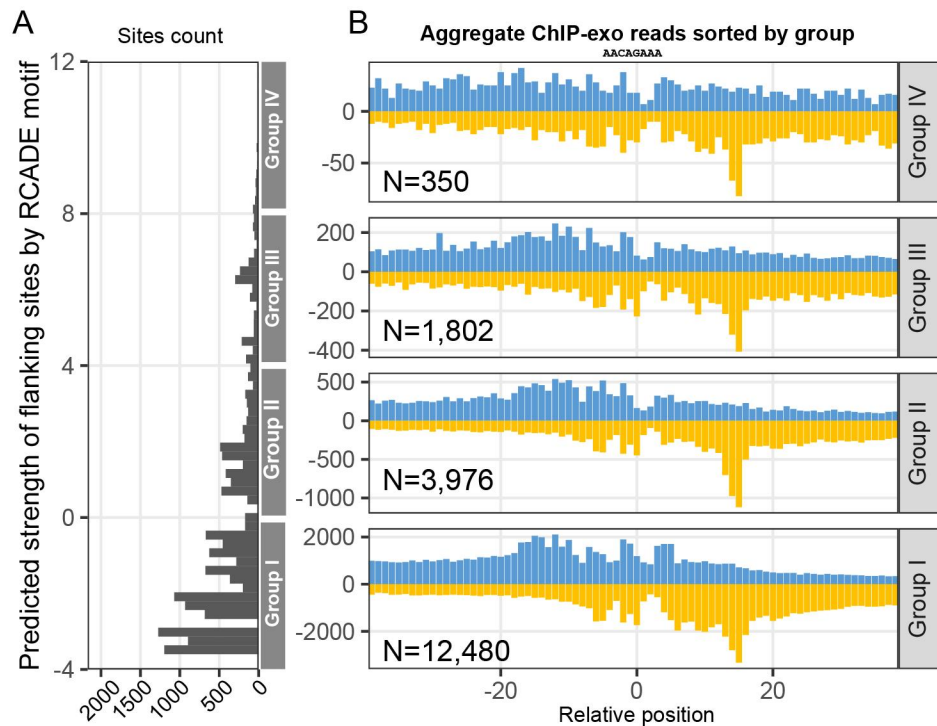

**Figure S11.** Distribution of binding sites strength estimated by RCADE's analysis of ZIM3's flanking motifs at positions (-5, 4, 5, 6) and the aggregate ChIP-exo footprinting plots as in Fig. 5E.

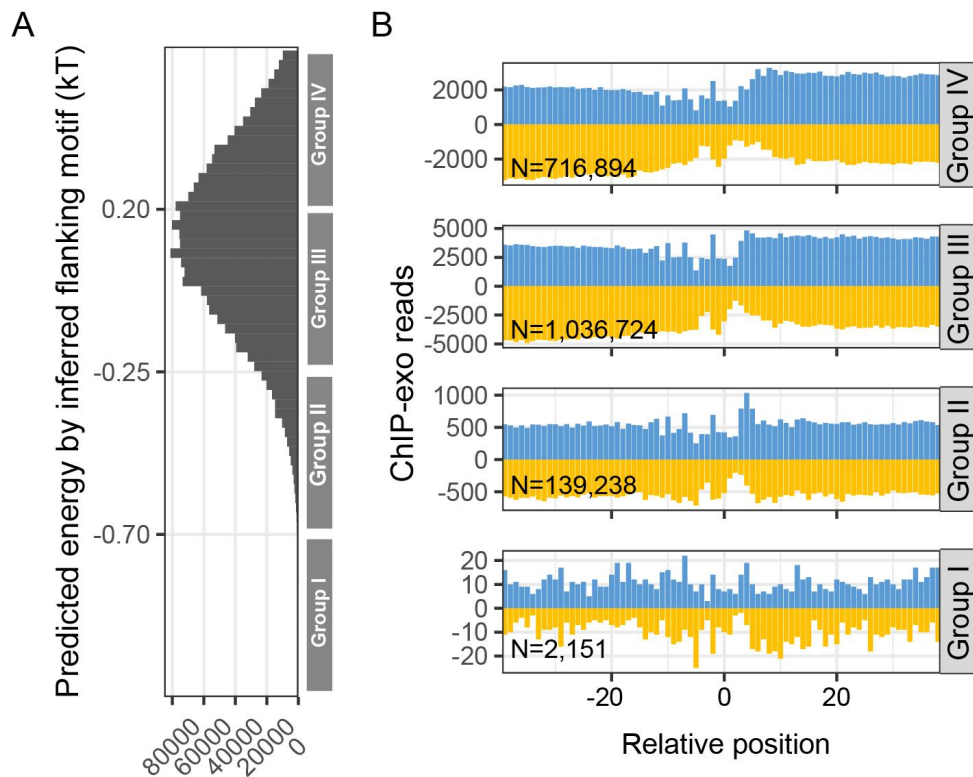

**Figure S12.** Aggregate ChIP-exo footprinting of all possible defective core sites within human genome

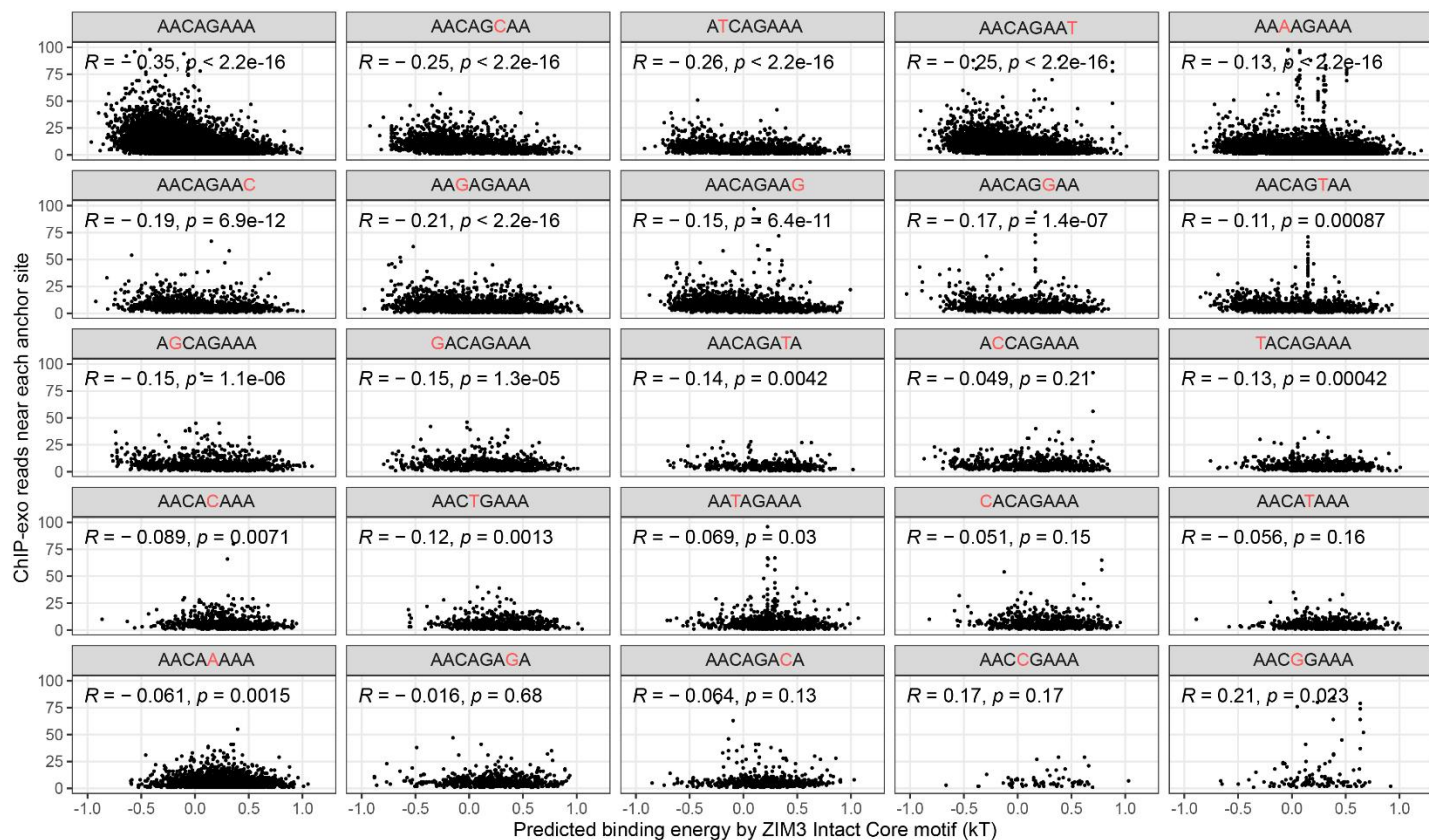

**Figure S13.** Correlation analysis between ChIP-exo reads around each type of anchor site and predicted binding energy by inferred ZIM3 motif from intact core case.

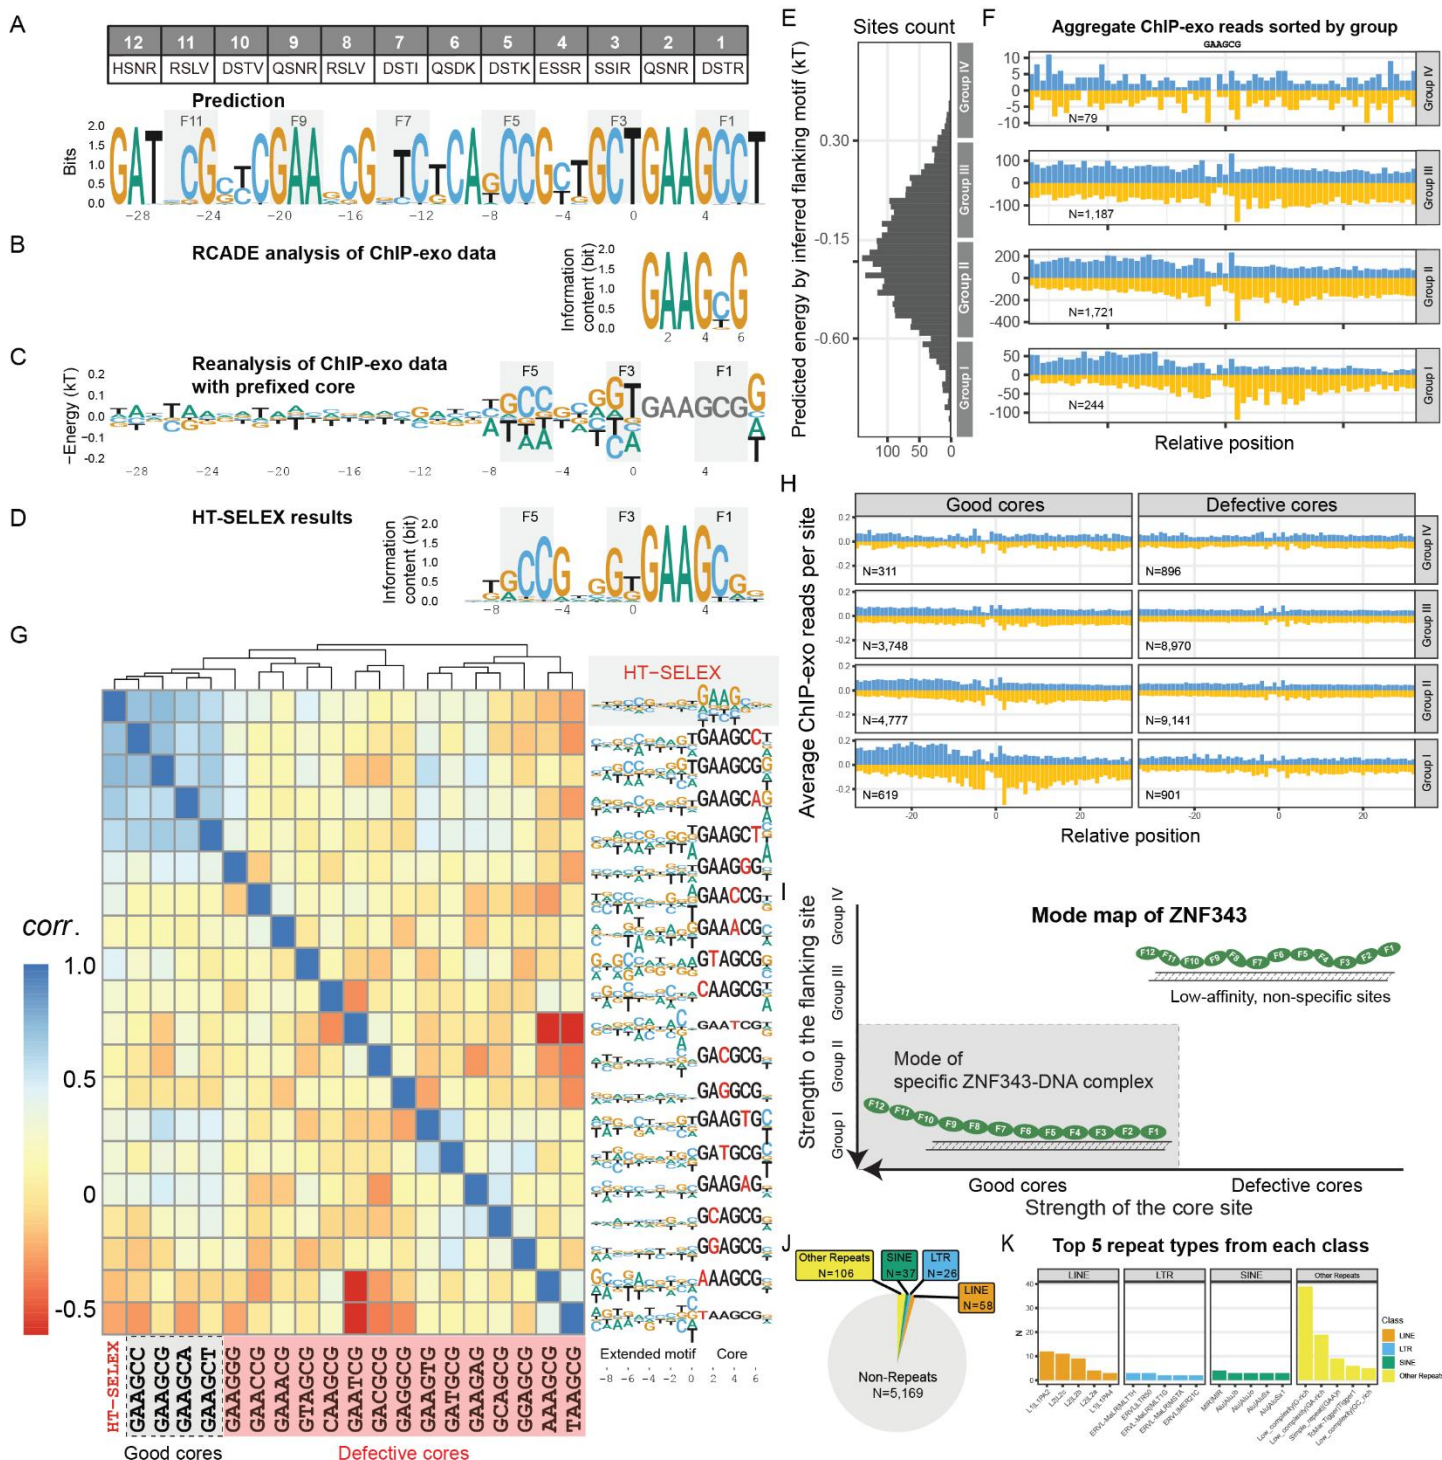

**Figure S14**

- A) Contact residues for human ZNF343; Motif prediction by B1H method;  
 B) Motif from RCADE analysis of ChIP-exo data;  
 C) Extended motif by reanalysis of ChIP-exo data with prefixed core GAAGCG;  
 D) HT-SELEX results of ZNF343;  
 E) Distribution of binding sites based on predicted binding energy by inferred flanking motifs;  
 Sites can be further sorted into four groups with equal energy bandwidth;  
 F) Aggregate ChIP-exo reads by Group, with GAAGCG prefixed in -3 to +2 positions;  
 G) Extended motifs by reanalysis of ChIP-exo data with all single variants of GAAGCG as the prefixed core;  
 Heatmap is generated by auto-correlation analysis of all extended motifs with different cores and HT-SELEX result; The ChIP-exo reads footprints near associated prefixed cores are shown on the right;  
 H) Aggregate ChIP-exo signals classified by type of cores and groups, respectively; The reads number are normalized by number of sites within each group;  
 I) Inferred recognition model of ZNF343;  
 J) Annotation of identified specific binding sites in Group I, II associated with good cores;

K) Top five repeat names for each repeat classes among specific binding sites.

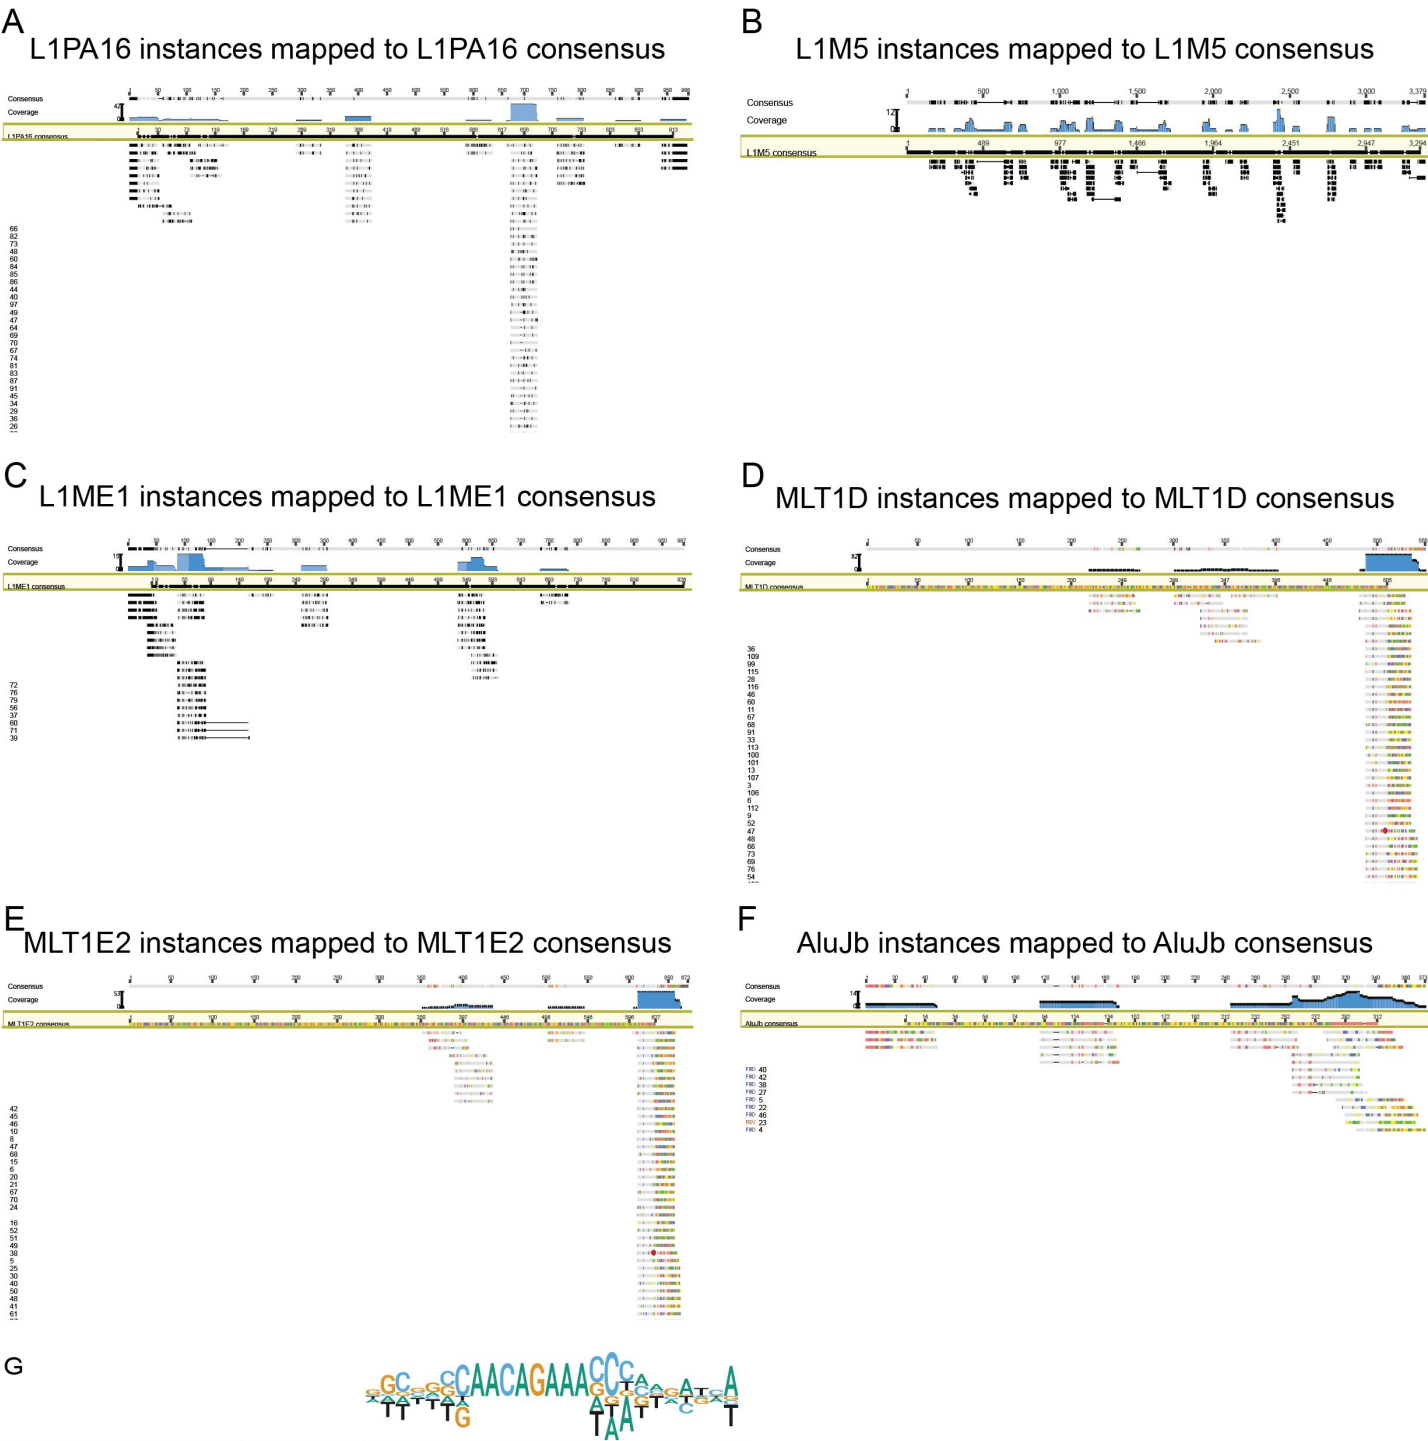

**Figure S15.** Alignment of identified ZIM3 specific binding sites mapped to the consensus sequence of corresponding repeat element.

A-F) Identified repeats elements from ZIM3's specific binding sites mapped to the consensus sequence of each repeat type;  
G) The inferred motif of ZIM3 in comparison of targeted positions within each repeat.

| REAGENT or RESOURCE                                   | SOURCE                        | ACCESS IDENTIFIER                                                                                                               |
|-------------------------------------------------------|-------------------------------|---------------------------------------------------------------------------------------------------------------------------------|
| <b>Bacterial and Virus Strains</b>                    |                               |                                                                                                                                 |
| E. coli BL21 (DE3) for recombinant protein expression | Agilent                       | #200131                                                                                                                         |
| E. coli Stellar strain for In-fusion cloning          | Clontech                      | #636763                                                                                                                         |
| <b>Chemicals, Peptides, and Recombinant Proteins</b>  |                               |                                                                                                                                 |
| HisSUMO-hZFY and its truncated variants               | This paper                    |                                                                                                                                 |
| HisSUMO-mZFY1                                         | This paper                    |                                                                                                                                 |
| HisHALO-CTCF(F1-F9), (F1-F11), and R567W              | This paper                    |                                                                                                                                 |
| <b>Critical Commercial Assays</b>                     |                               |                                                                                                                                 |
| High-throughput sequencing                            | Illumina Miseq or Nextseq 500 |                                                                                                                                 |
| Fluorescence anisotropy, including kinetic assay      | Tecan Safire 2                | www.tecan.com                                                                                                                   |
| <b>Sequencing Data</b>                                |                               |                                                                                                                                 |
| Raw and analyzed Affinity-seq data                    | This paper                    | NCBI GEO GSE111772                                                                                                              |
| Raw and analyzed Spec-seq data for ZFY                | This paper                    | NCBI GEO GSE109098                                                                                                              |
| Raw and analyzed Methyl-Spec-seq data for CTCF        | This paper                    | NCBI GEO GSE188164                                                                                                              |
| ChIP-exo data for ZIM3 and ZNF343                     | Trono Lab                     | NCBI GEO GSE78099                                                                                                               |
| <b>Oligonucleotides</b>                               |                               |                                                                                                                                 |
| Randomized DNA libraries for Spec-seq experiment      | This paper                    | ZFY Rand1-12, CTCF-R1, R2, R3, etc                                                                                              |
| Randomized DNA libraries for HT-SELEX experiment      | This paper                    | ZFY-SELEX R1,R2                                                                                                                 |
| FAM-labeled ZFY-reference dsDNA probes                | This paper                    | ZFY-reference-FAM                                                                                                               |
| Unlabeled ZFY-reference competitor dsDNA              | This paper                    | ZFY-competitor                                                                                                                  |
| <b>Recombinant DNA</b>                                |                               |                                                                                                                                 |
| Plasmids: HisSUMO-hZFY and its truncated variants     | This paper                    | Stormo lab                                                                                                                      |
| Plasmids: Halo-tagged hZFY and mZFY1 for Affinity-seq | This paper                    | Petkov lab                                                                                                                      |
| Plasmid: HisSUMO-CTCF(F1-F9)                          | Addgene                       | Addgene #102859                                                                                                                 |
| Plasmid: HisHALO-CTCF(F1-F9), (F1-F11), and R567W     | This paper                    | Fordyce lab                                                                                                                     |
| <b>Software and Analysis workflows</b>                |                               |                                                                                                                                 |
| MACS                                                  | Xiaole Shirley Liu Lab        | <a href="http://liulab.dfci.harvard.edu/MACS/">http://liulab.dfci.harvard.edu/MACS/</a>                                         |
| MEME                                                  | MEME suite                    | <a href="http://meme-suite.org/">http://meme-suite.org/</a>                                                                     |
| Zinc finger motif prediction model                    | Singh Lab                     | <a href="http://zf.princeton.edu/">zf.princeton.edu/</a>                                                                        |
| Zinc finger motif database                            | Hughes Lab                    | <a href="http://cisbp.cabr.utoronto.ca">http://cisbp.cabr.utoronto.ca</a>                                                       |
| TF motif database                                     | JASPAR                        | <a href="http://jaspar.genereg.net">jaspar.genereg.net</a>                                                                      |
| TFCookbook for specificity modelling                  | Zheng Zuo                     | <a href="https://github.com/zeropin/TFCookbook">https://github.com/zeropin/TFCookbook</a>                                       |
| TEcookbook for repeats annotation                     | Zheng Zuo                     | <a href="https://github.com/zeropin/TECookbook">https://github.com/zeropin/TECookbook</a>                                       |
| Analysis of ZFY Spec-seq data                         | Zheng Zuo                     | <a href="https://github.com/zeropin/ZFPCookbook/ZFY">https://github.com/zeropin/ZFPCookbook/ZFY</a>                             |
| Analysis of CTCF Methyl-Spec-seq data                 | Zheng Zuo                     | <a href="https://github.com/zeropin/ZFPCookbook/CTCF">https://github.com/zeropin/ZFPCookbook/CTCF</a>                           |
| ModeMap analysis of ZIM3 and ZNF343data               | Zheng Zuo                     | <a href="https://github.com/zeropin/ZFPCookbook/ZIM3">https://github.com/zeropin/ZFPCookbook/ZIM3</a> (or ZNF343)               |
| RCAD analysis of ChIP-exo data                        | Hughes lab                    | <a href="http://kznmotifs.cabr.utoronto.ca/report.php?name=ZNF343">http://kznmotifs.cabr.utoronto.ca/report.php?name=ZNF343</a> |

Table S3 Key Resources Table
